# Supplementary material
Source: PubMed Central journal article supplement (PMC3788084)
Supplement: NIHMS500628-supplement-01.pdf [file NIHMS500628-supplement-01.pdf]

608  
609

### Online Supplement: Figure Legends

610 **Figure 1S Imagestream flow cytometry of CD45<sup>+</sup>CCR3<sup>+</sup> leukocytes in CHES and/or**  
611 **AERD.** We used Imagestream<sup>®</sup> flow cytometry as described in the text to confirm  
612 that the CCR3<sup>+</sup> cells were eosinophils.

613 **Figure 2S IFN- $\gamma$  potentiation of eosinophilopoiesis.** CD34<sup>+</sup> enriched hematopoietic stem  
614 cells were cultured for 3 days with SCF, TPO, Flt3L, IL-3, and IL-5 after which  
615 they were cultured for 3 additional weeks with just IL-3 and IL-5 with or without  
616 the additional presence of IFN- $\gamma$ . Media was changed weekly. After 3 weeks  
617 aliquots were cytospun and stained (hematoxylin-eosin (H&E)). **Figure 2SA.** Cells  
618 matured with only IL-5 and IL-3 (200x). **Figure 2SB.** Cells matured in the  
619 additional presence of IFN- $\gamma$  (200x). **Figure 2SC.** Cells matured in the additional  
620 presence of IFN- $\gamma$  (400x). Viable cells with bi-lobed nuclei and granules are  
621 demonstrated along with numerous apoptotic bodies. All viable cells have the  
622 appearance of granulocytes.

623 **Figure 3S Absence of basophil markers on CD34<sup>+</sup> derived eosinophils.** CD34<sup>+</sup> enriched  
624 hematopoietic stem cells were cultured for 3 days with SCF, TPO, Flt3L, IL-3, and  
625 IL-5 after which they were cultured for 3 additional weeks with just IL-3 and IL-5  
626 with or without the additional presence of IFN- $\gamma$ . Media was changed weekly.  
627 After 3 weeks aliquots were collected and analyzed by flow cytometry for  
628 expression of CD203c and Fc $\epsilon$ RI.

629  
630

15

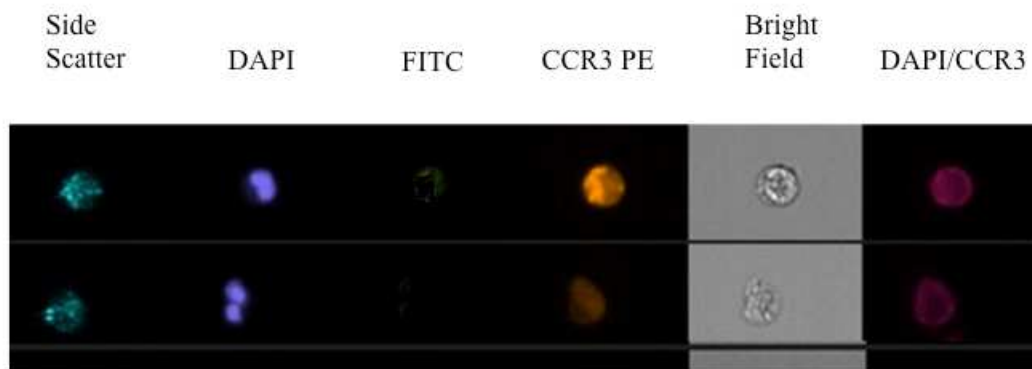

ACCEPTED

2SA

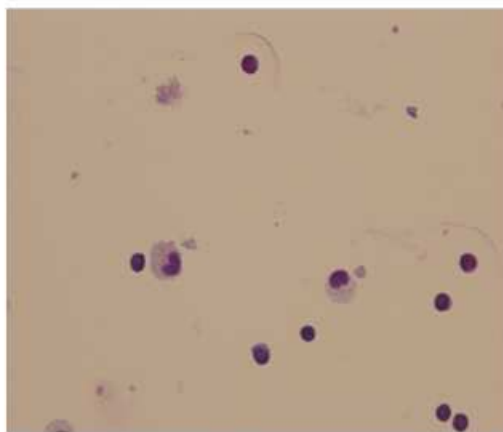

200X

ACCEPTED

2SB

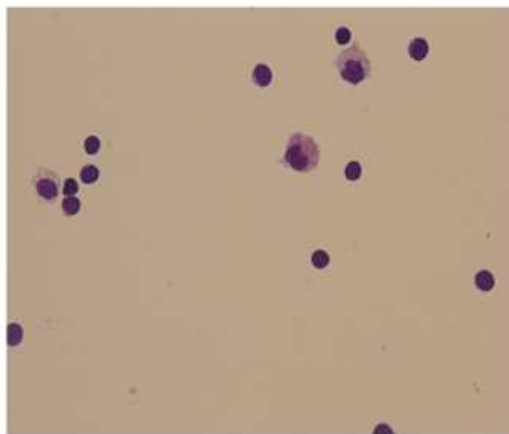

200X

ACCEPTED

2SC

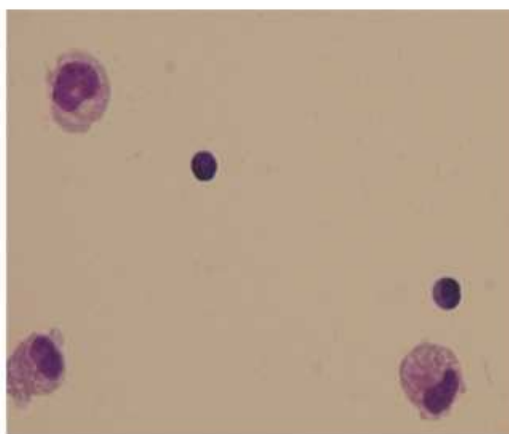

400X

ACCEPTED

38

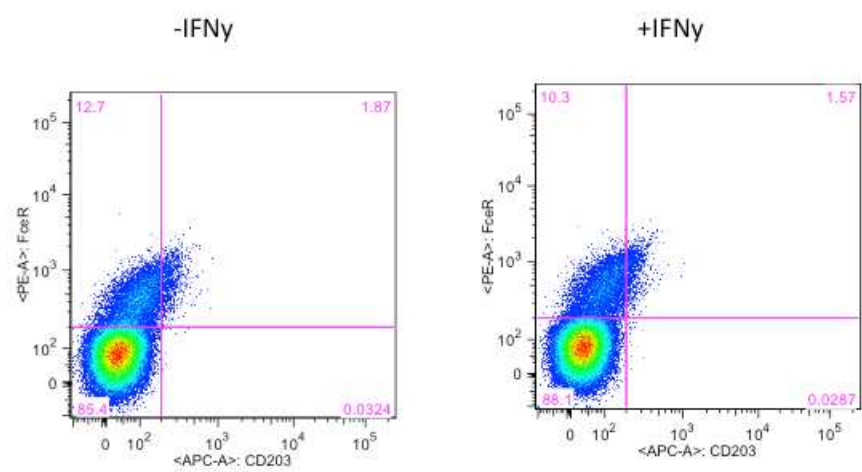

ACCEPTED
